# Supplementary material for: Long-Time Dynamics of Selected Molecular-Motor Components Using a Physics-Based Coarse-Grained Approach
Source: MDPI journal article supplement (doi:10.3390/biom13060941), 2023-06-05
Supplement: s1 [file s1]

**Supplementary Material for**  
**Long-Time Dynamics of Selected Molecular-Motor Components by**  
**Using a Physics-Based Coarse-Grained Approach**

A. Liwo, M. Pyrka, C. Czaplewski, X. Peng, A. J. Niemi

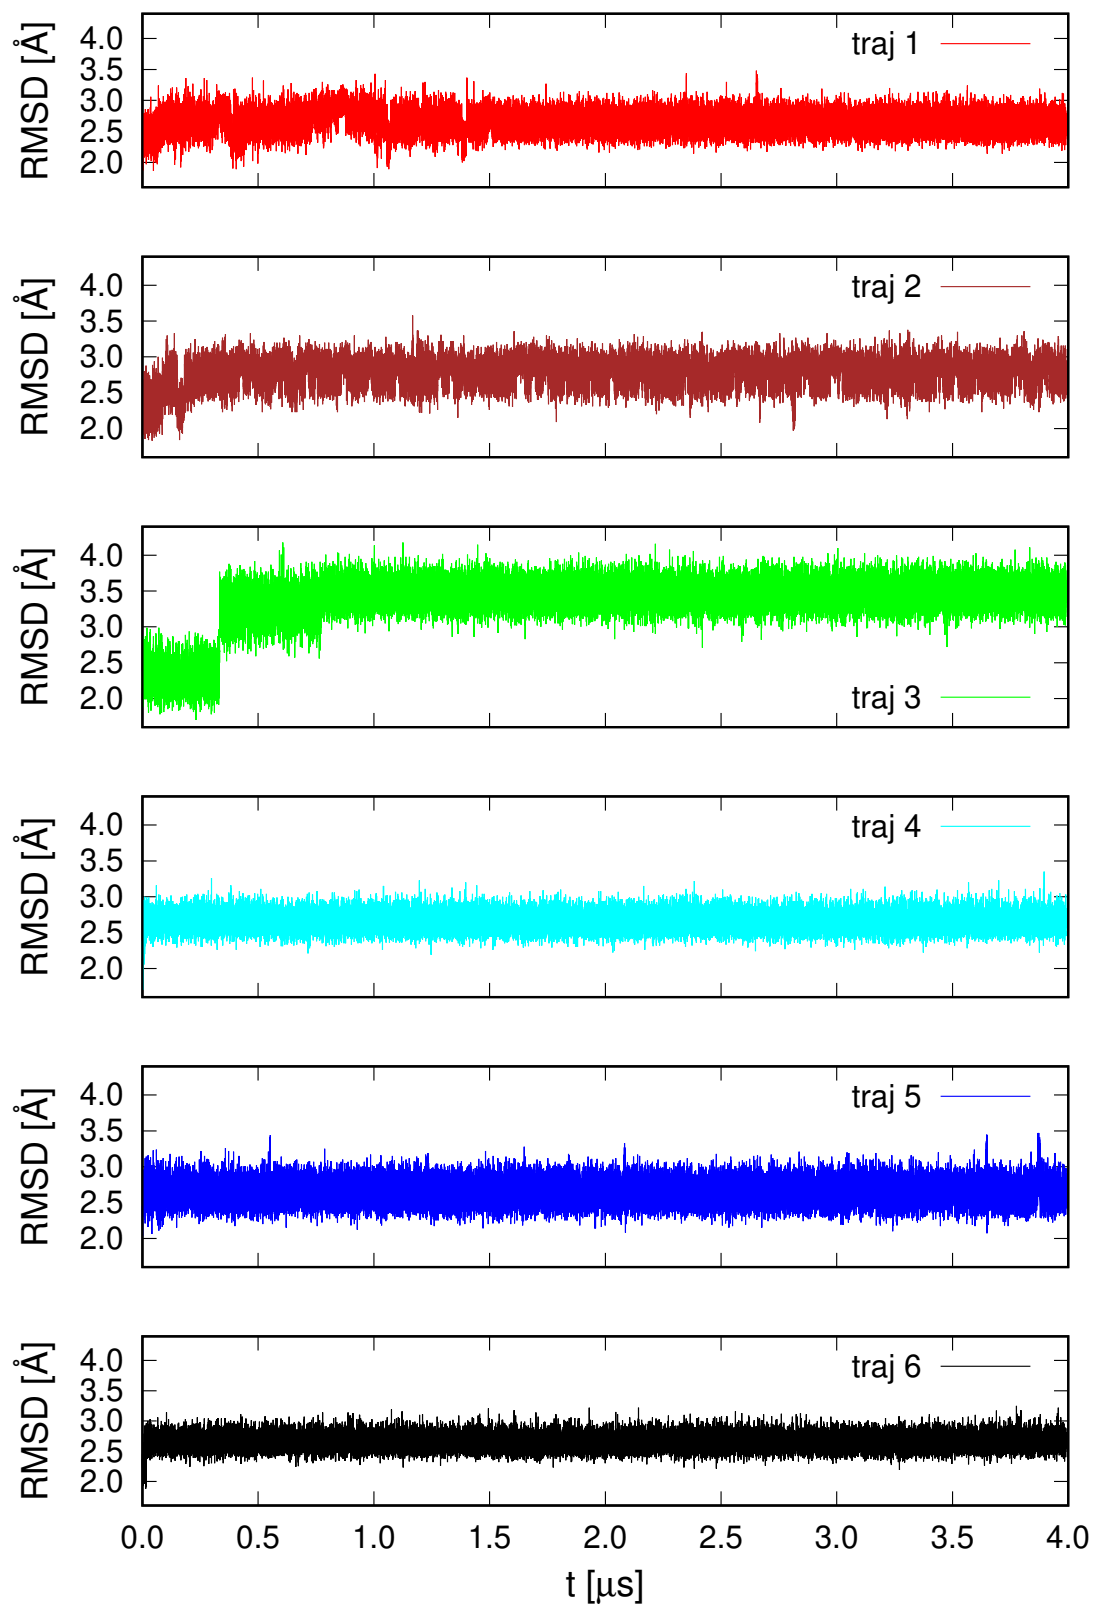

Figure S1: Variation of  $C^\alpha$ -RMSD with simulation time for the 6 microcanonical MD trajectories of the 4YY2 system.

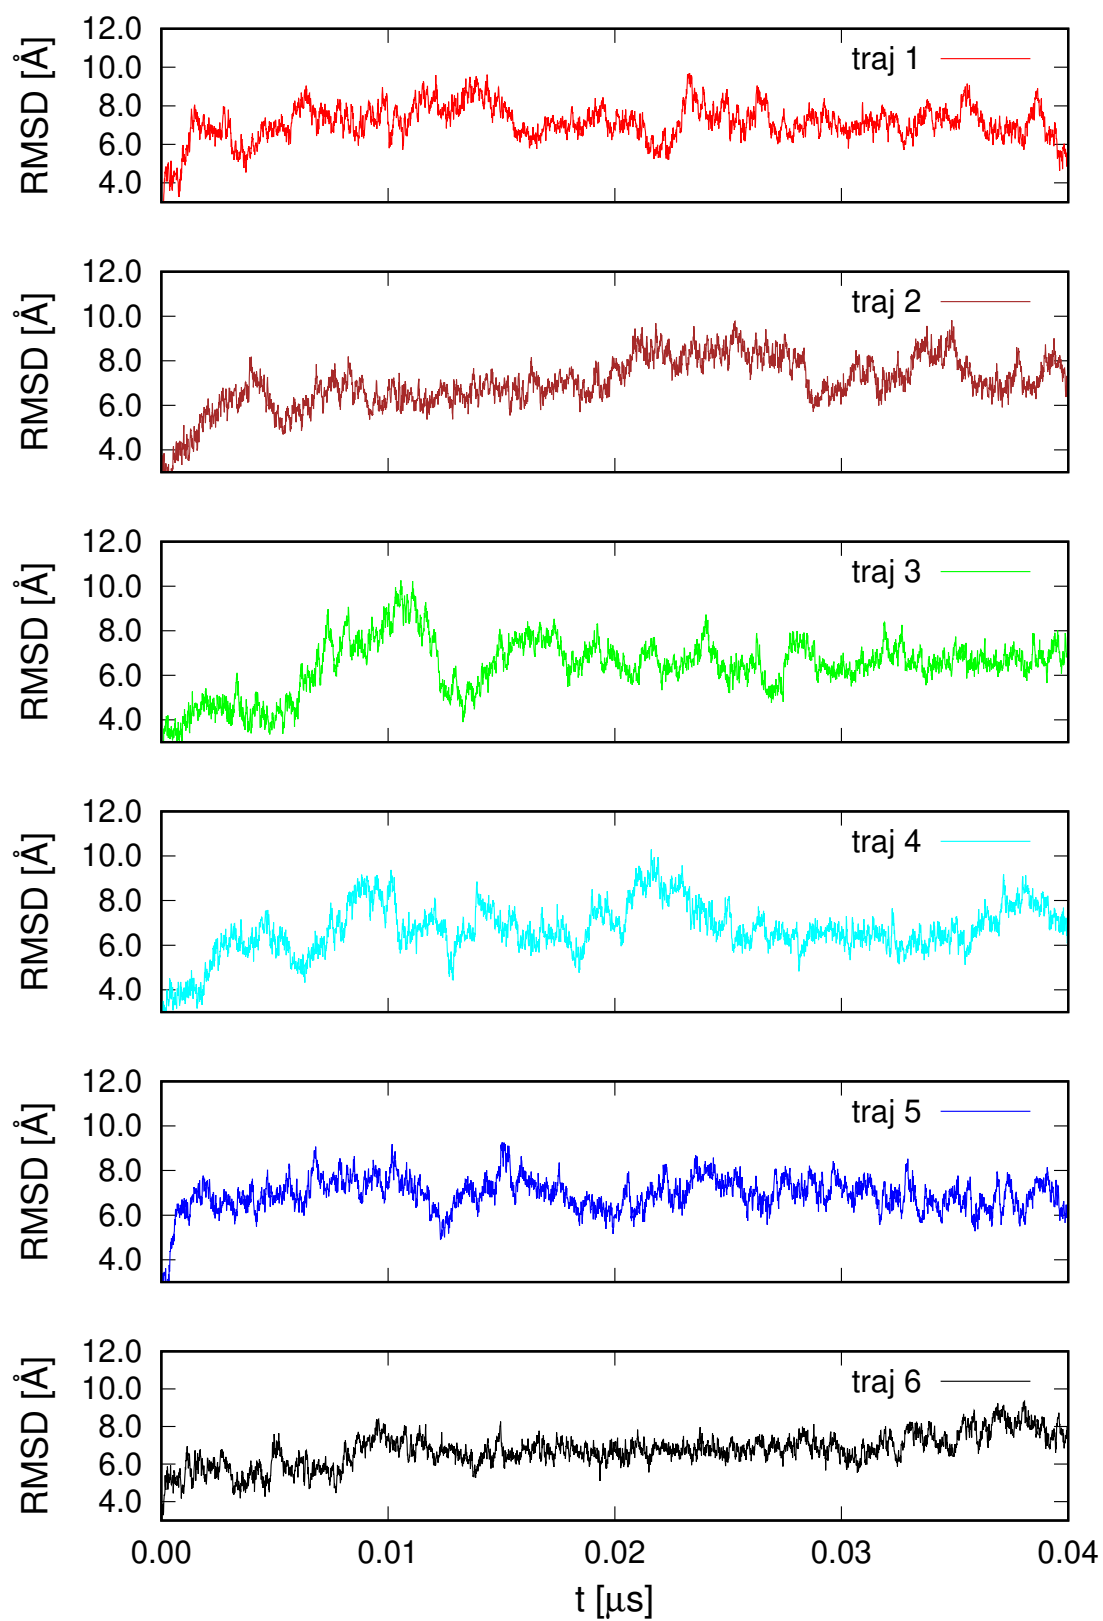

Figure S2: Variation of C $^{\alpha}$ -RMSD with simulation time for the 6 canonical MD trajectories of the 4YY2 system.

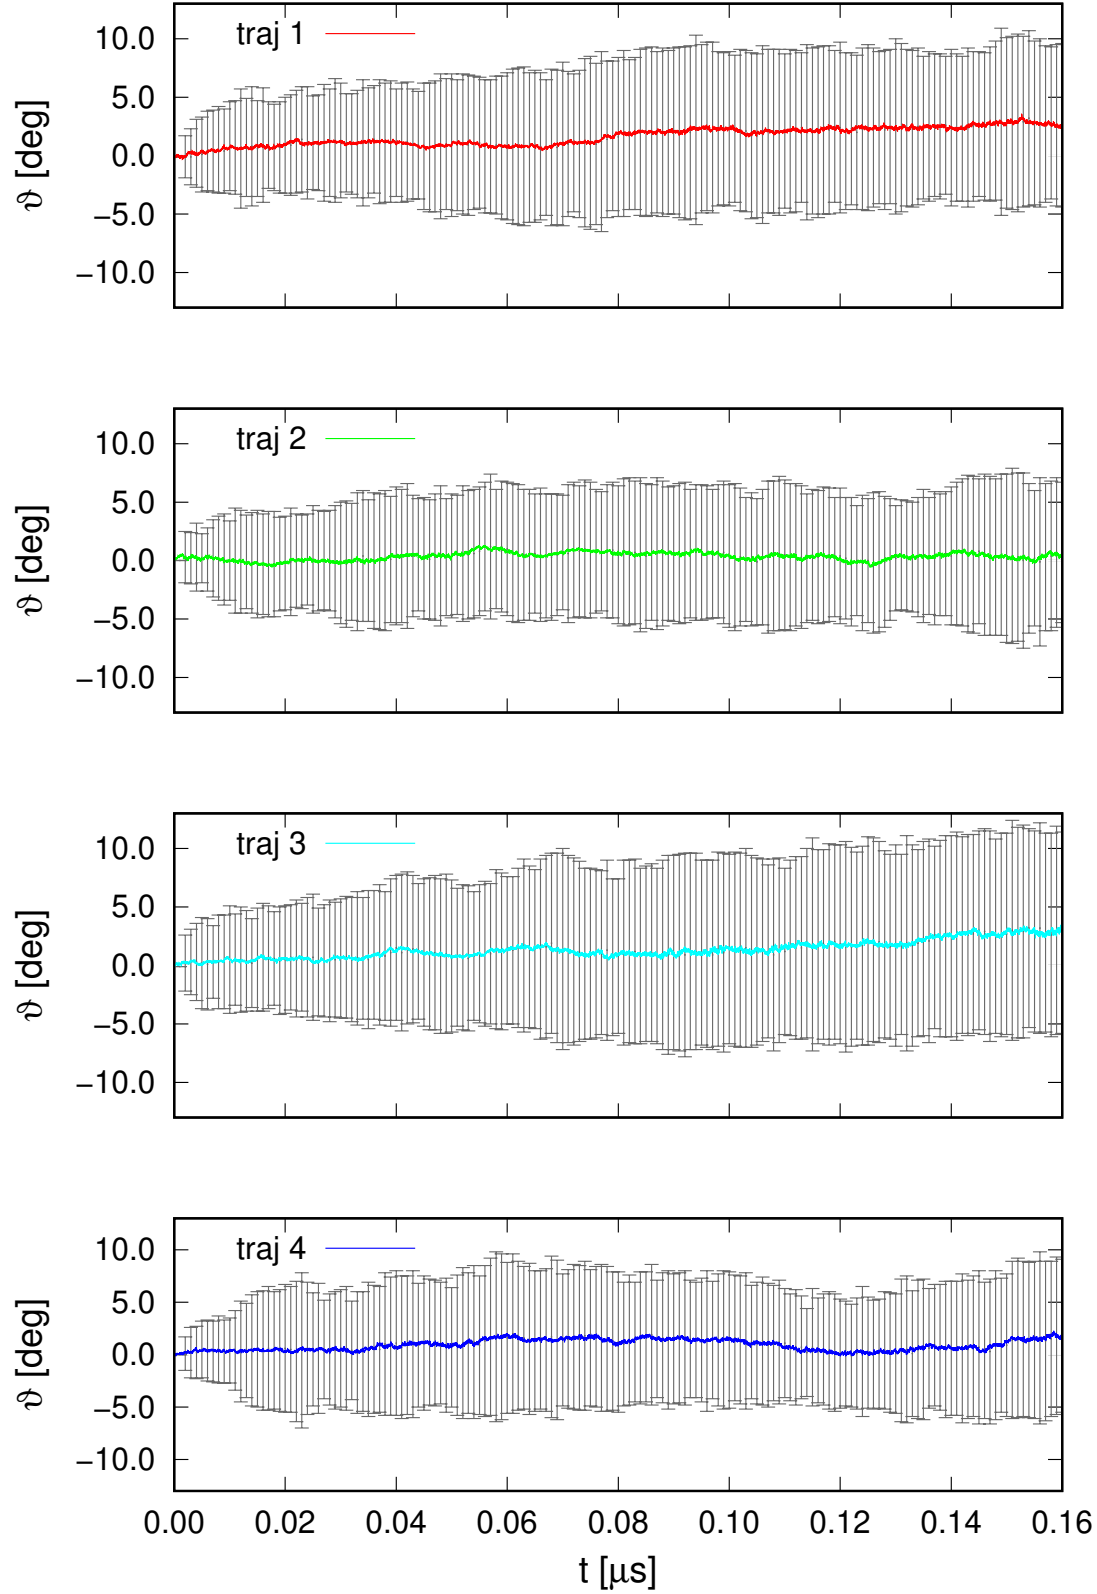

Figure S3: Variation of the average rotation angle  $\vartheta$  (Equation (6) of the main text) with simulation time for the 4 microcanonical MD trajectories with type I restraints of the 6SD5 system. The errorbars (gray) amount to  $\pm$  standard deviation and have been drawn every 100th point to avoid overcrowding the plot.

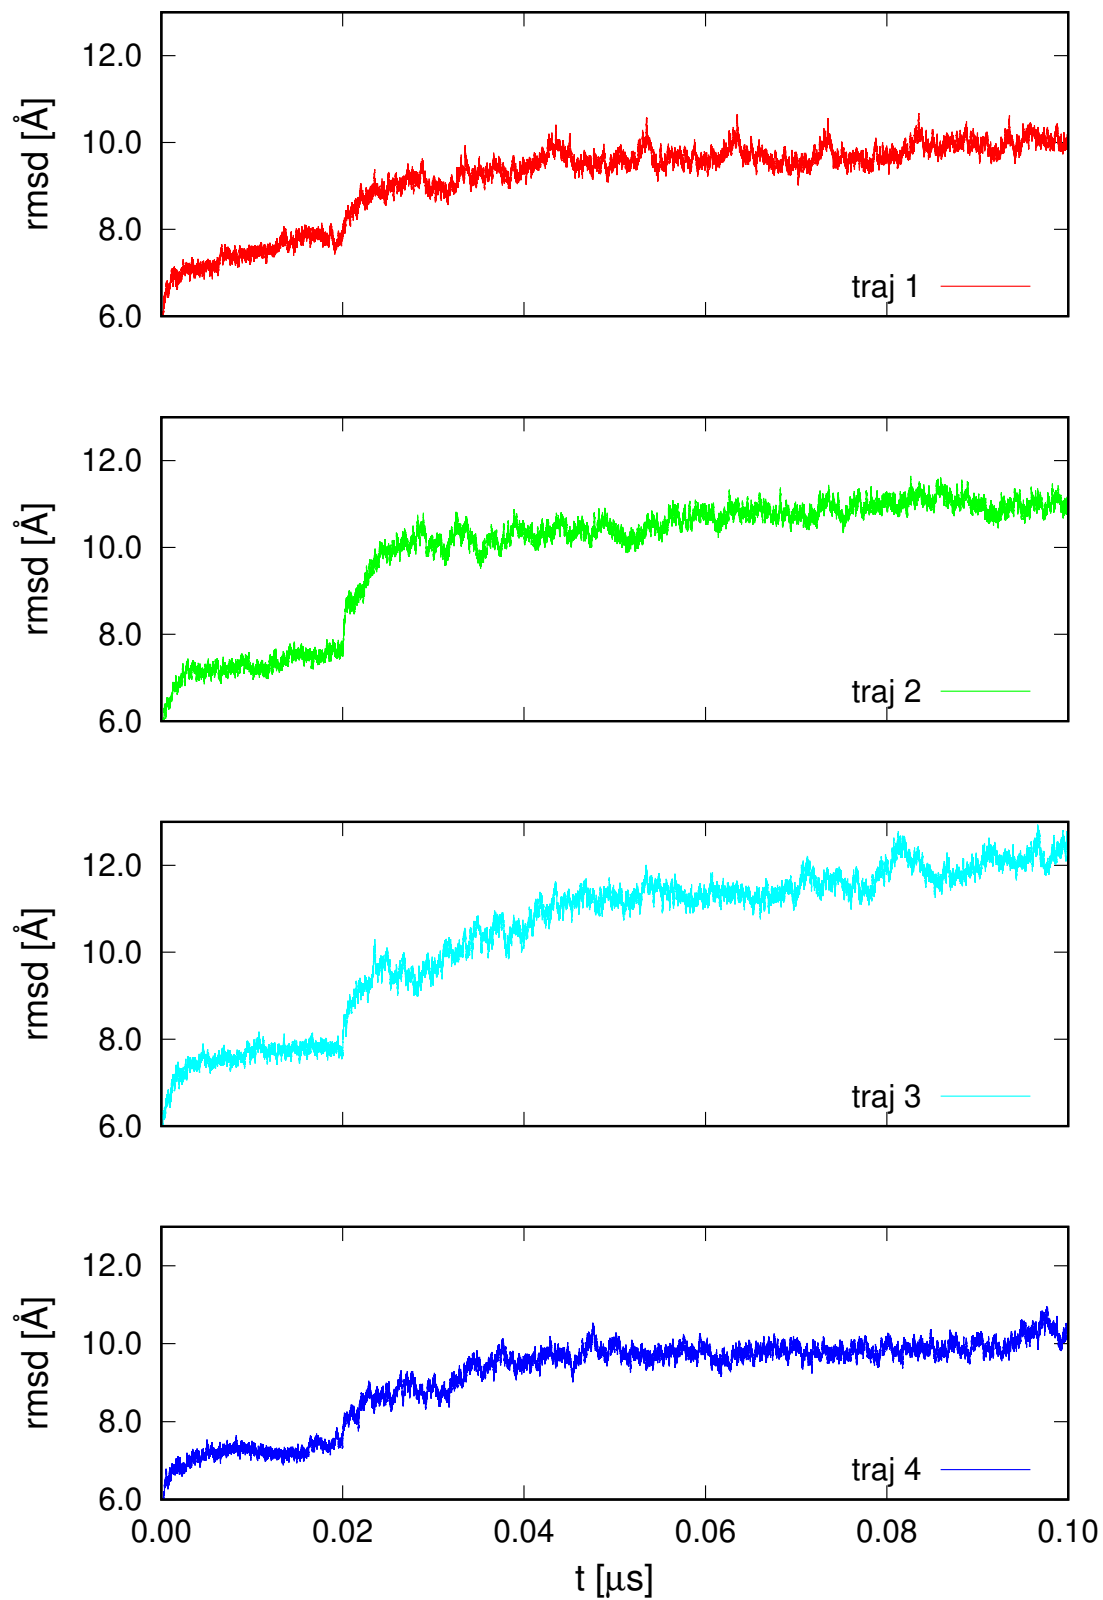

Figure S4: Variation of  $C^\alpha$ -RMSD with simulation time for the 4 canonical MD trajectories with type I restraints of the 6SD5 system.

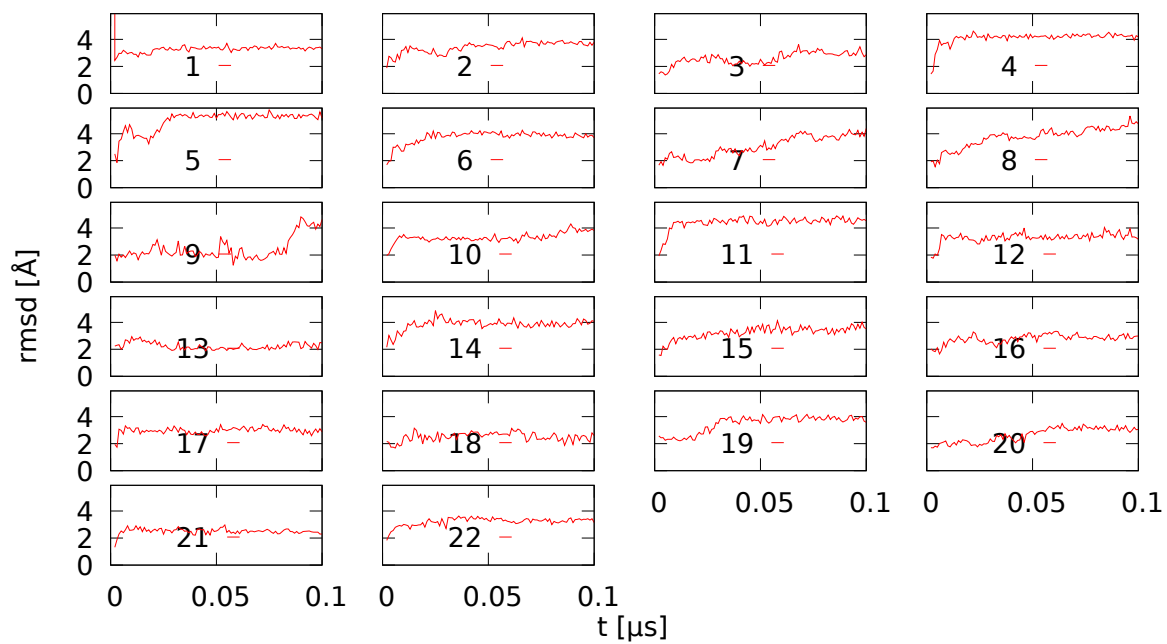

A

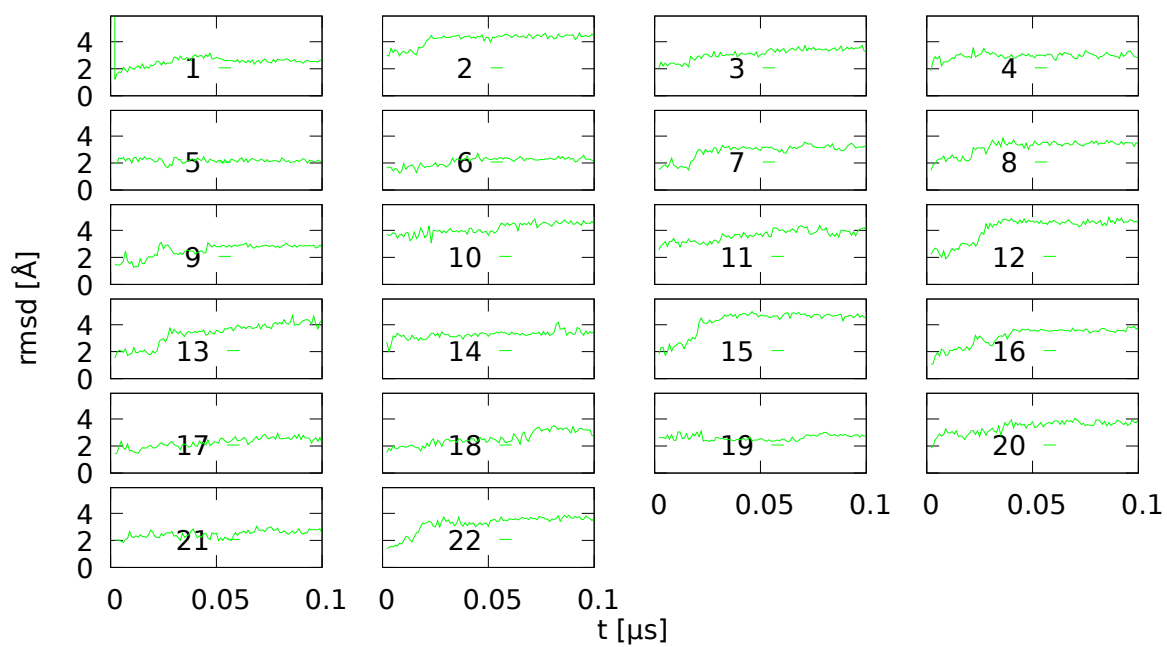

B

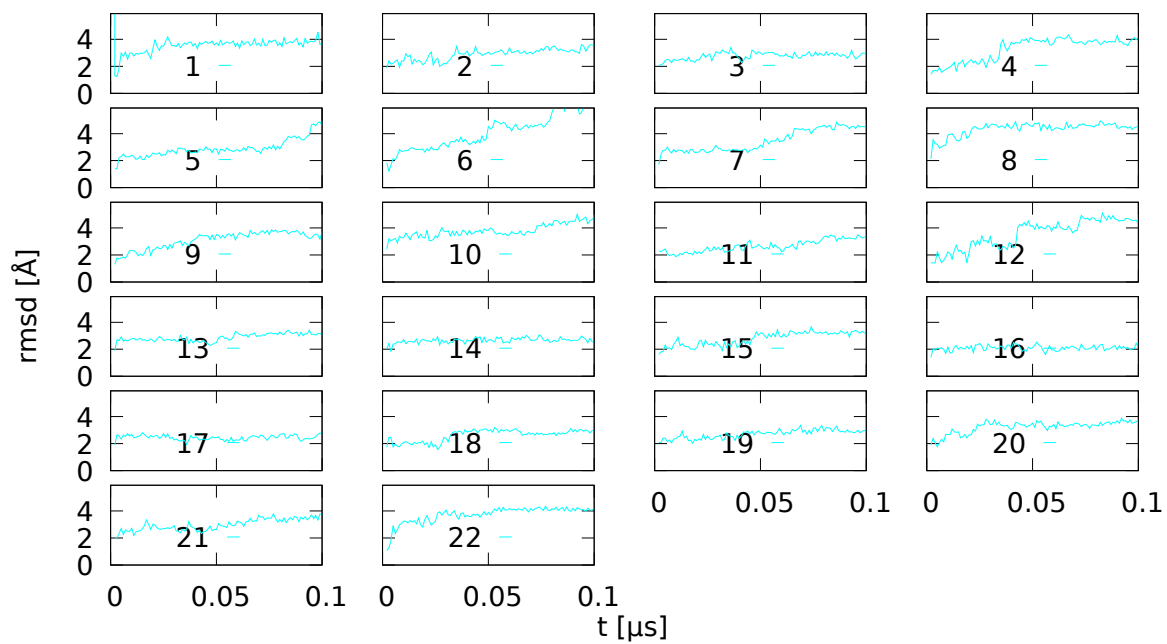

C

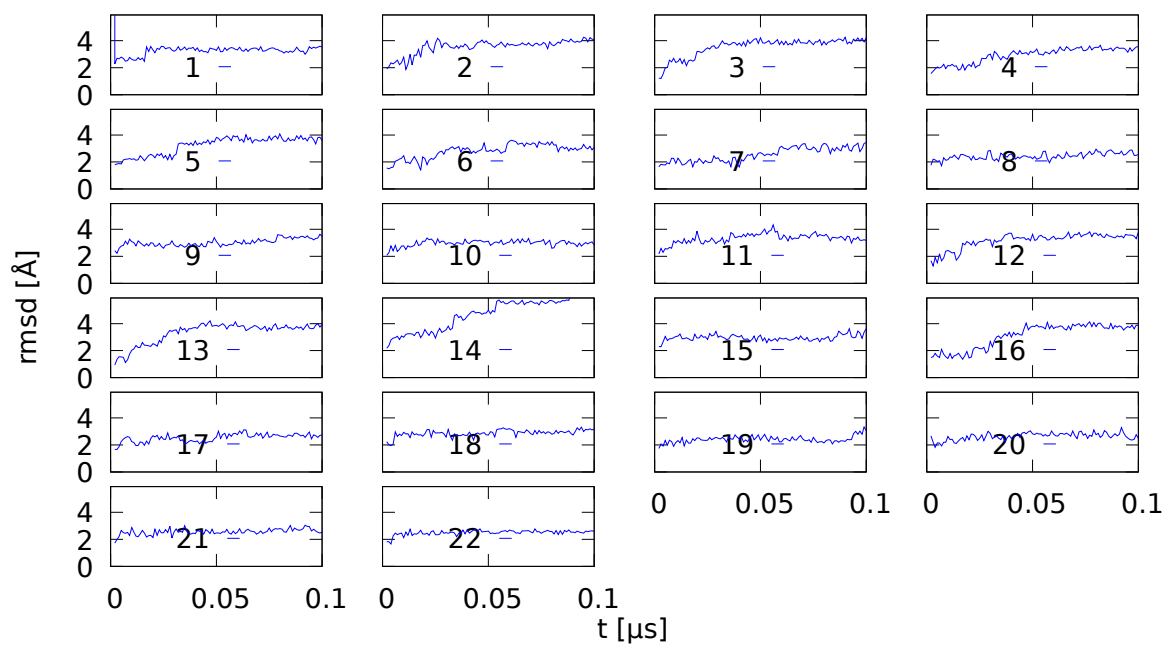

D

Figure S5: Variation of  $C^\alpha$ -RMSD of the monomers of 6SD5 from their initial structures with simulation time for the 4 canonical MD trajectories (A – D) with type I restraints. The sub-panels are labelled with the numbers of the consecutive monomers.

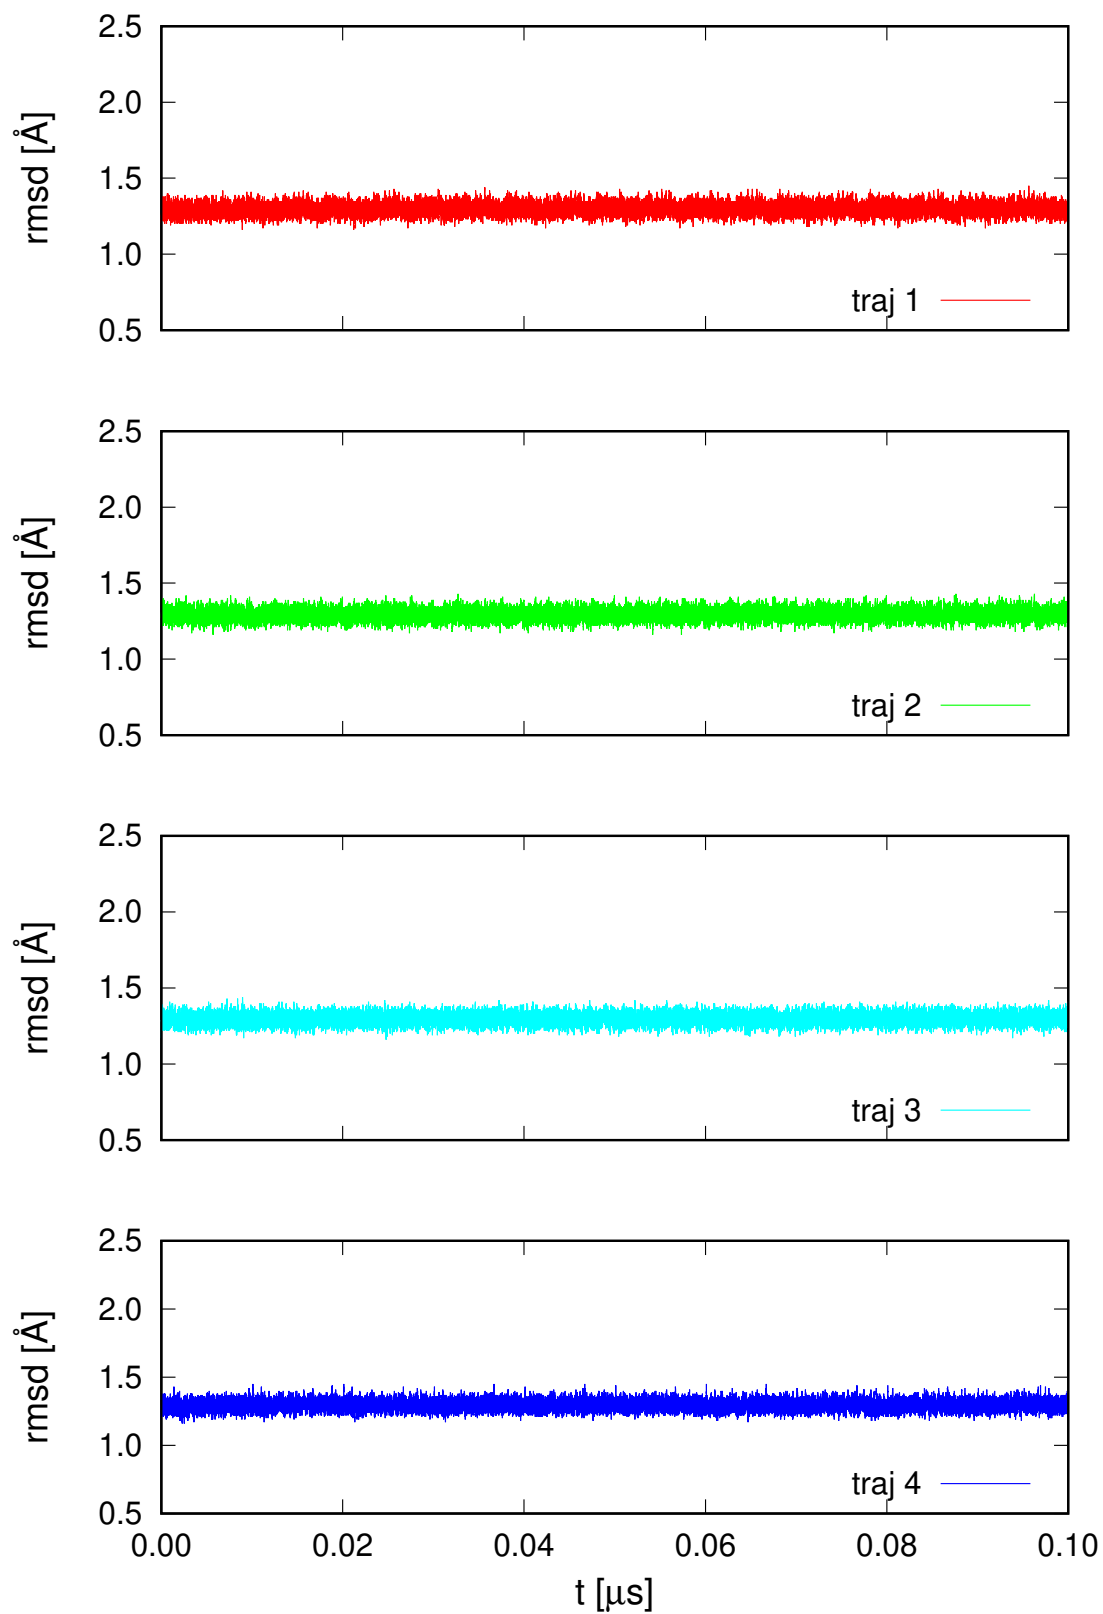

Figure S6: Variation of  $C^\alpha$ -RMSD with simulation time for the 4 canonical MD trajectories with type II restraints of the 6SD5 system.



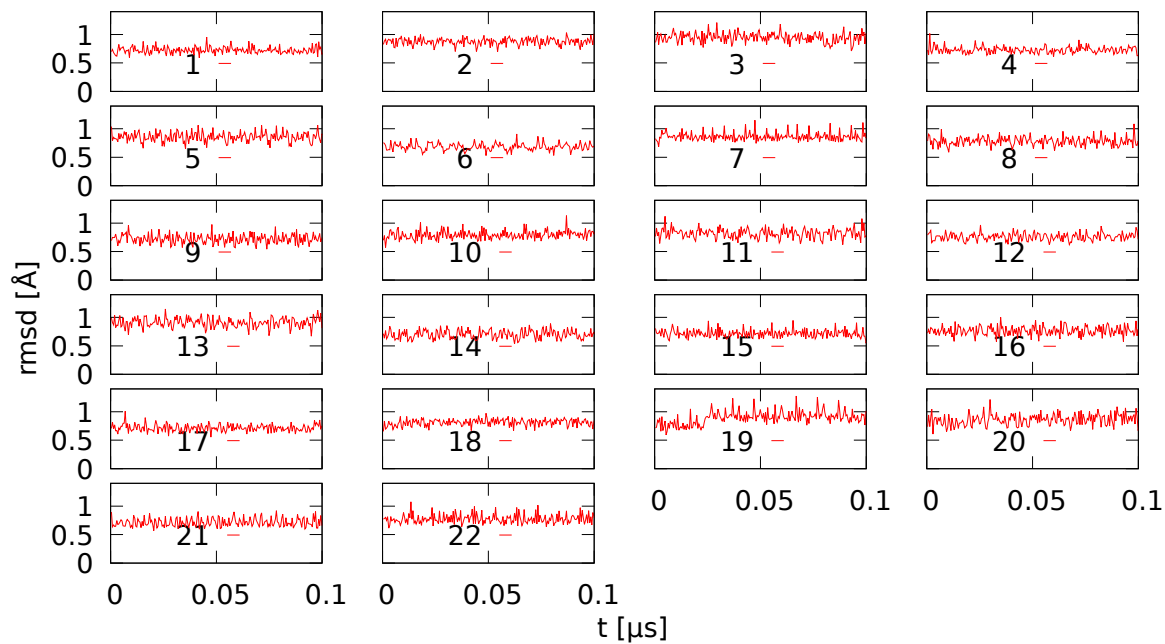

A

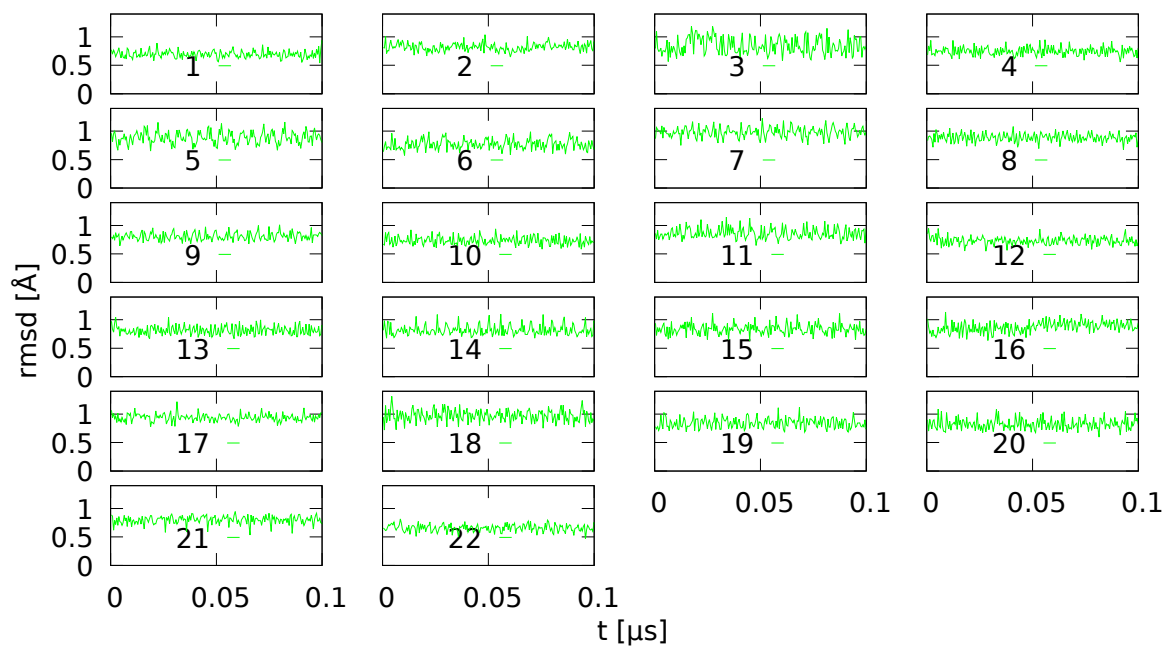

B

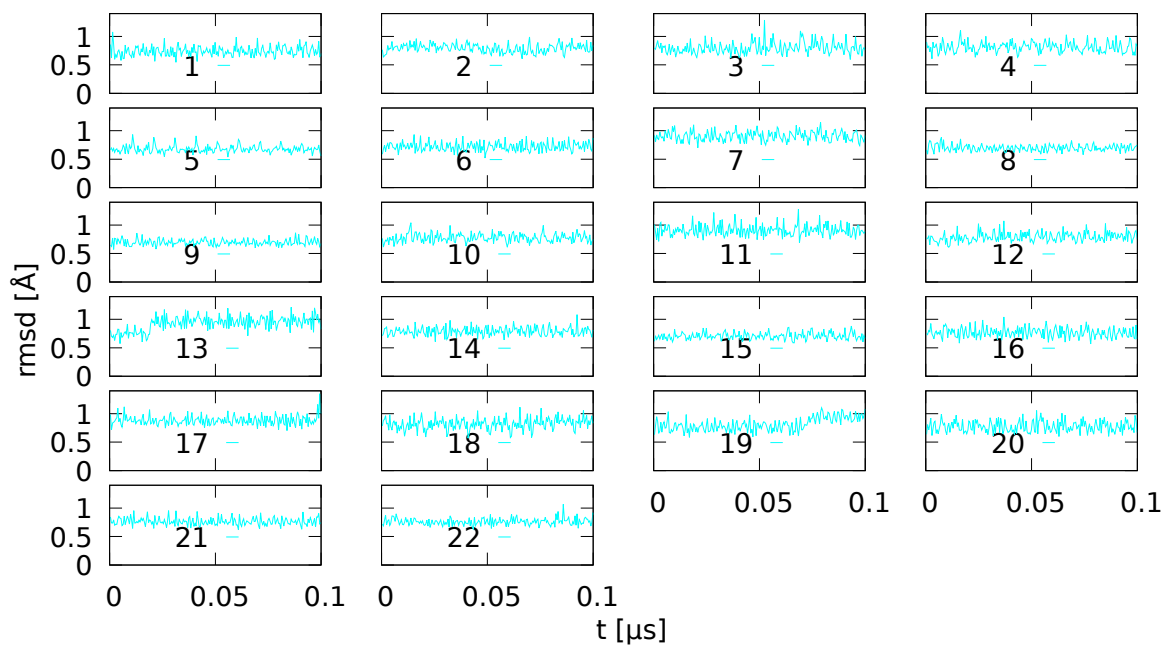

C

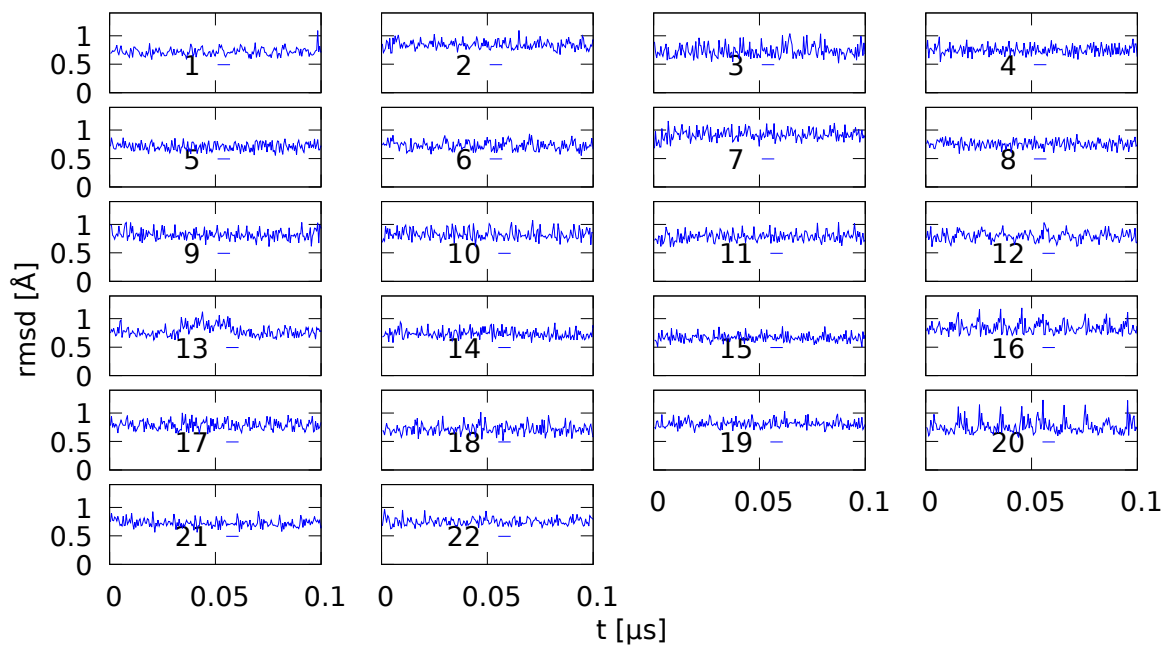

D

Figure S7: Variation of  $C^\alpha$ -RMSD of the monomers of 6SD5 from their initial structures with simulation time for the 4 canonical MD trajectories (A – D) with type II restraints. The sub-panels are labelled with the numbers of the consecutive monomers.

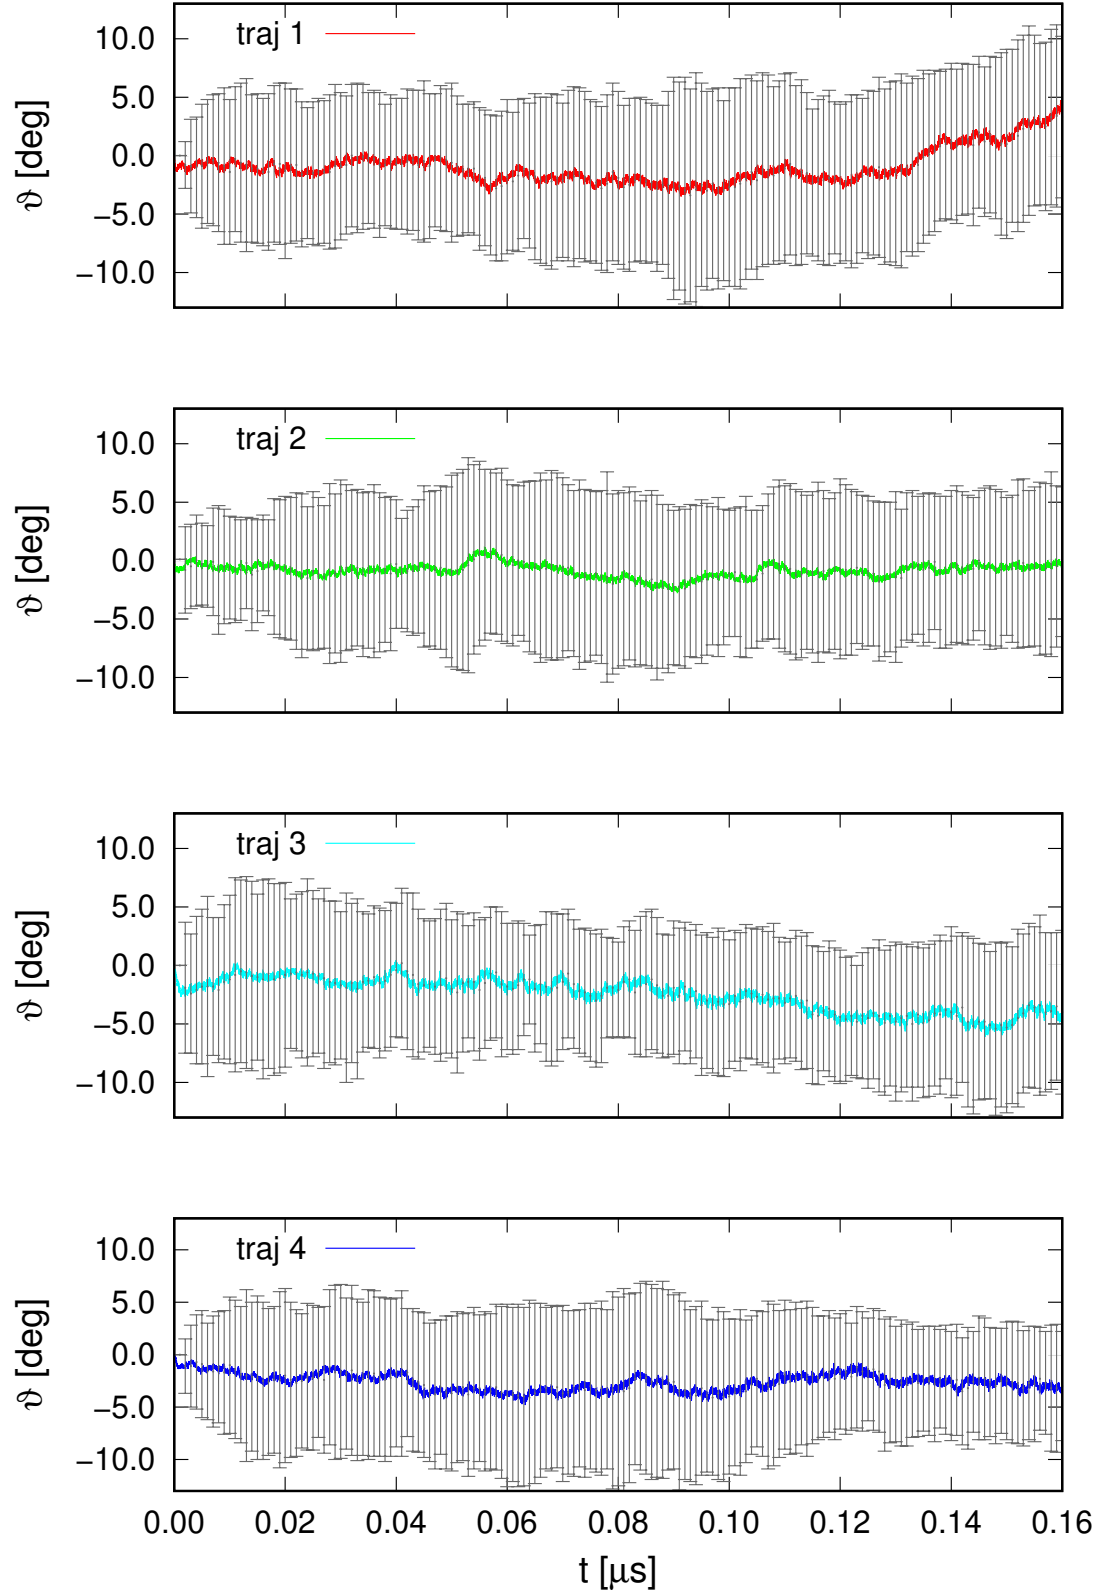

Figure S8: Variation of the average rotation angle  $\vartheta$  (Equation (6) of the main text) with simulation time for the 4 microcanonical MD trajectories with type I restraints of the 2BL2 system. The errorbars (gray) amount to  $\pm$  standard deviation and have been drawn every 100th point to avoid overcrowding the plot.

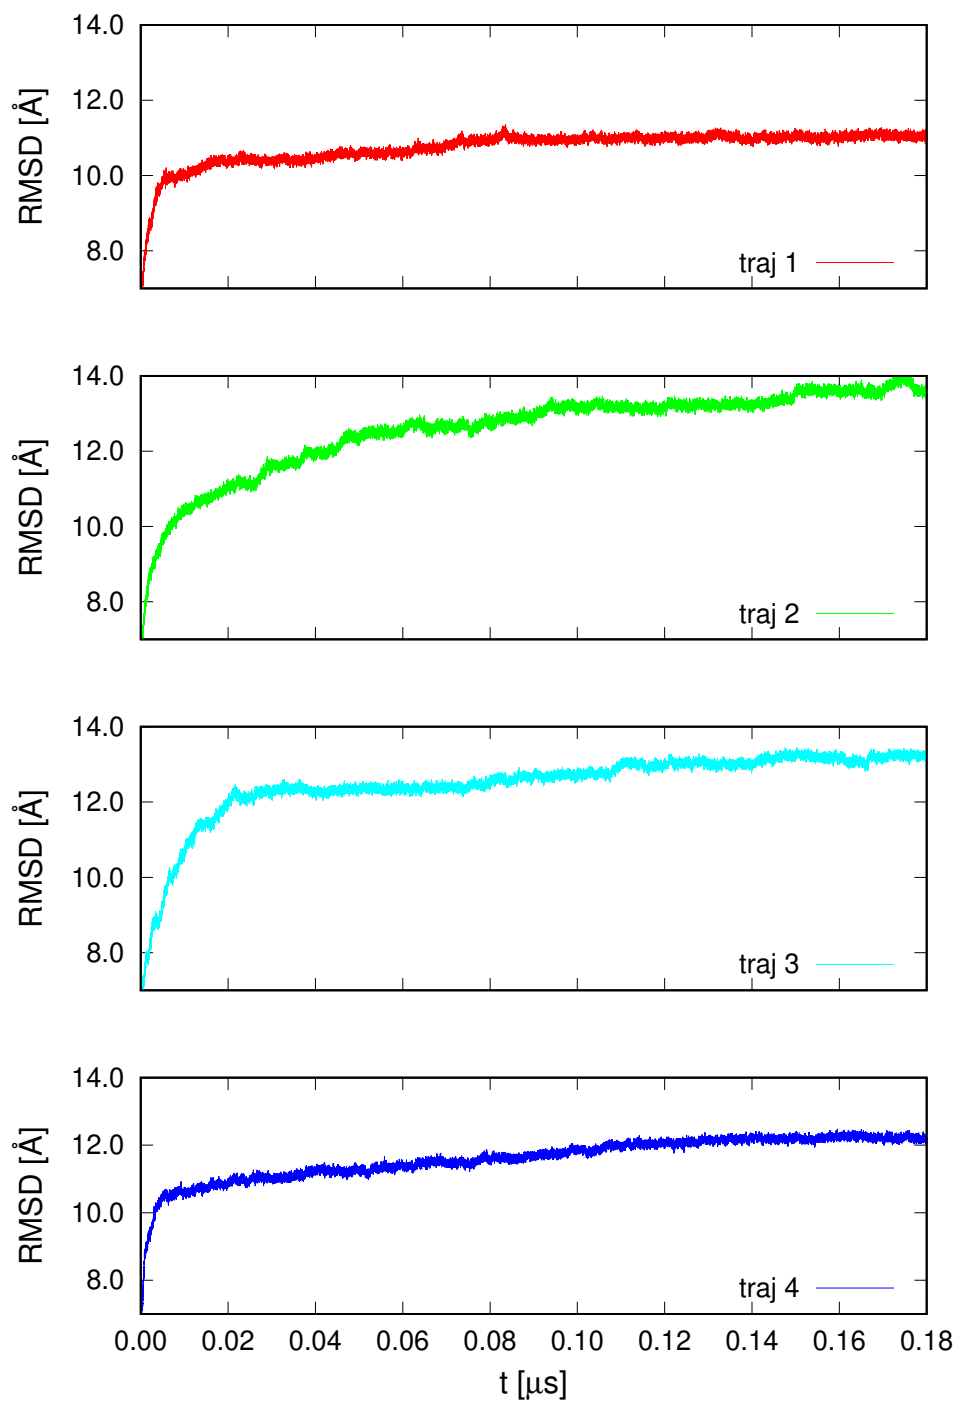

Figure S9: Variation of  $C^\alpha$ -RMSD with simulation time for the 4 canonical MD trajectories with type I restraints of the 2BL2 system.

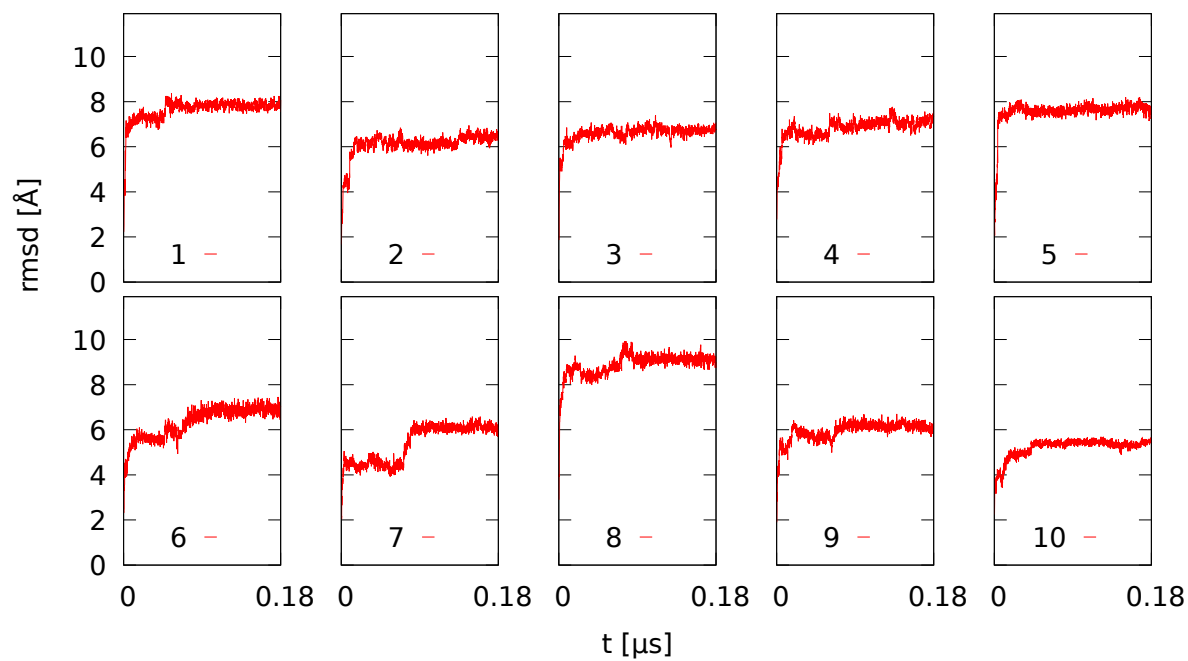

A

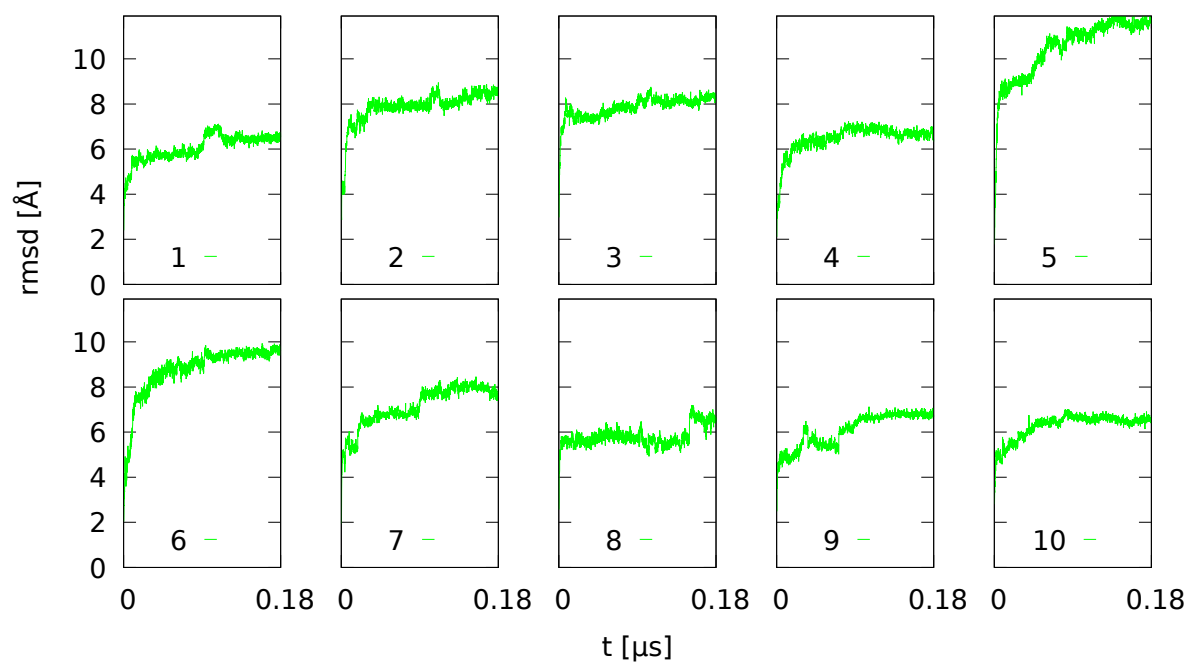

B

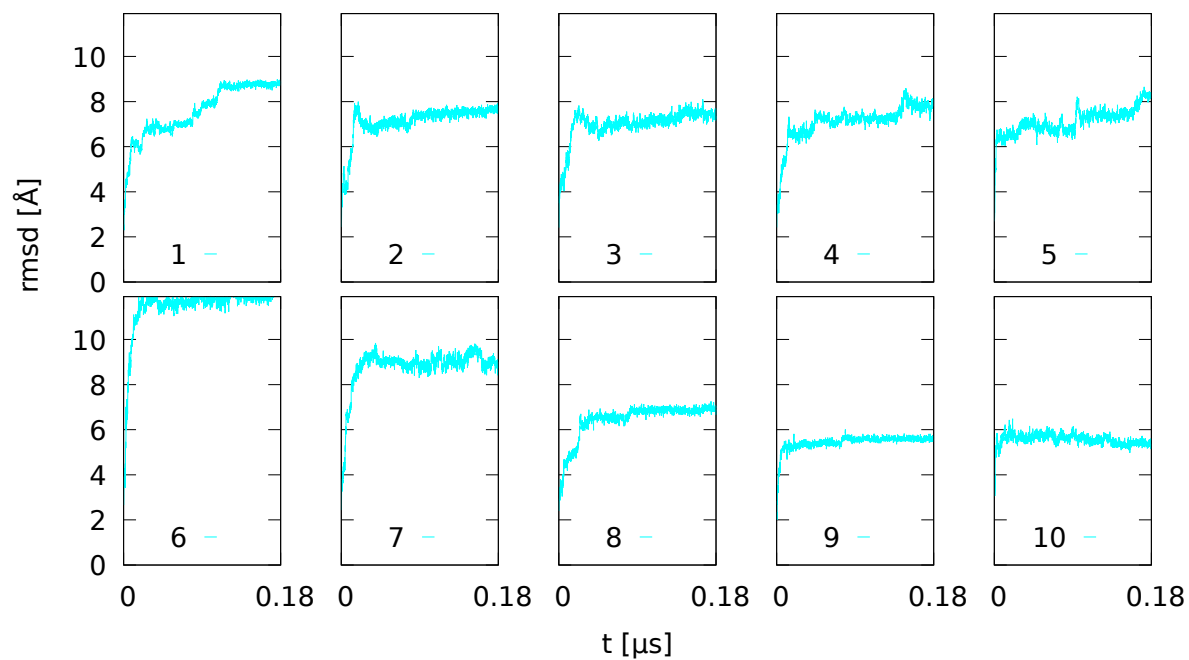

C

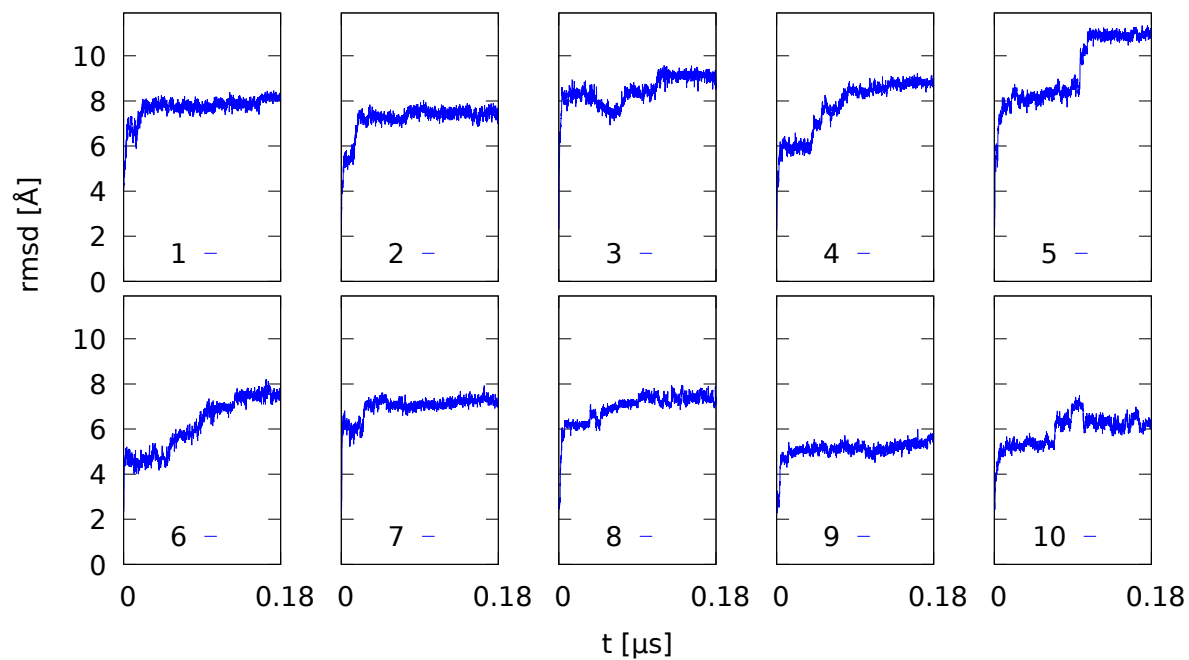

D

Figure S10: Variation of C $^{\alpha}$ -RMSD of the monomers of 2BL2 from their initial structures with simulation time for the 4 canonical MD trajectories (A – D) with type I restraints. The sub-panels are labelled with the numbers of the consecutive monomers.

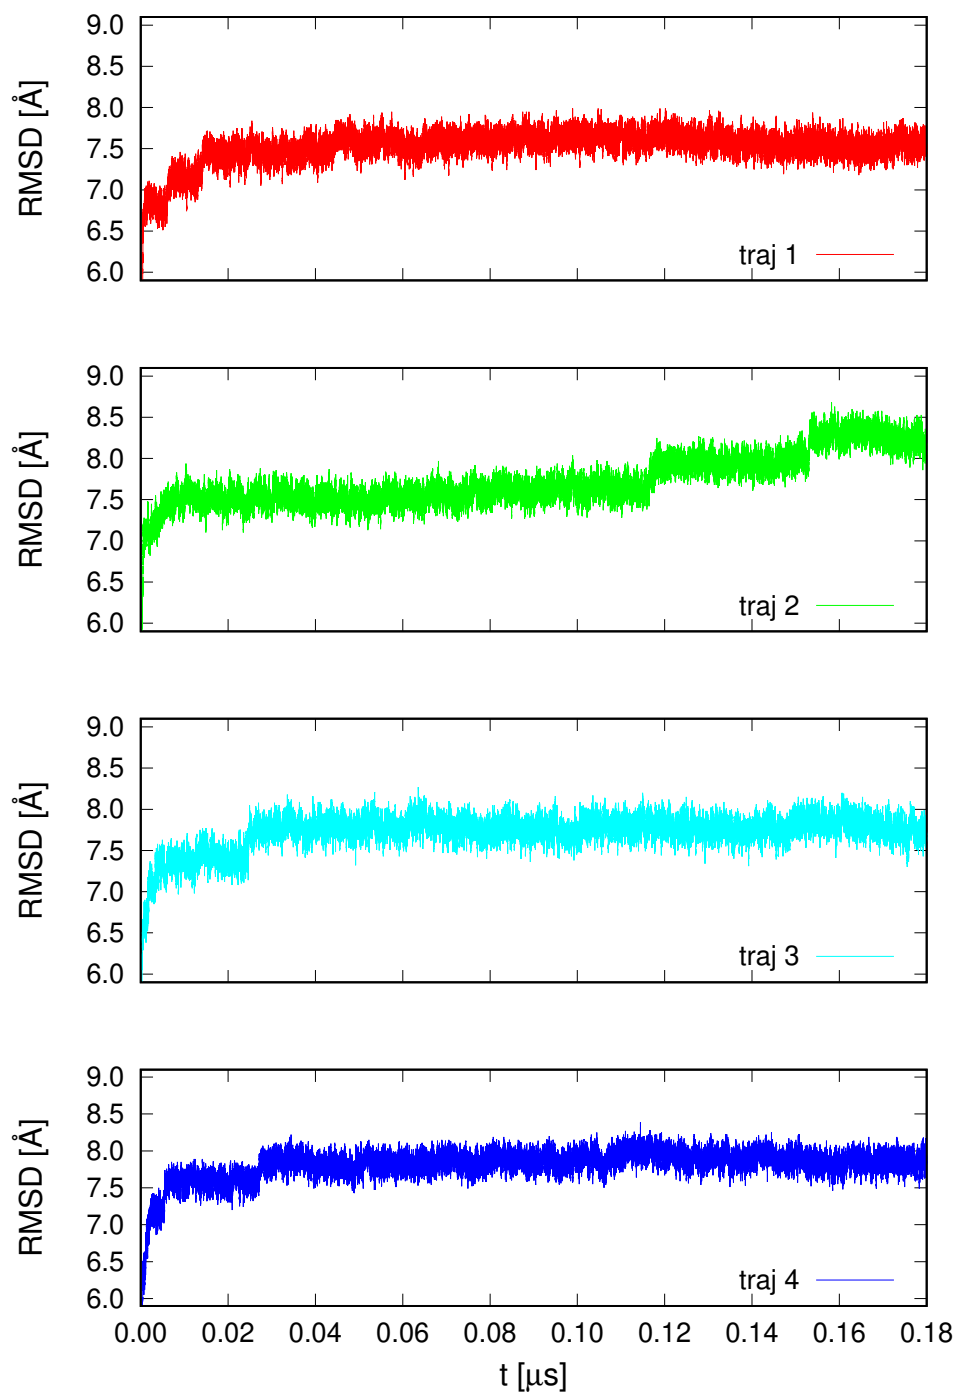

Figure S11: Variation of C<sup>α</sup>-RMSD with simulation time for the 4 canonical MD trajectories with type II restraints of the 2BL2 system.

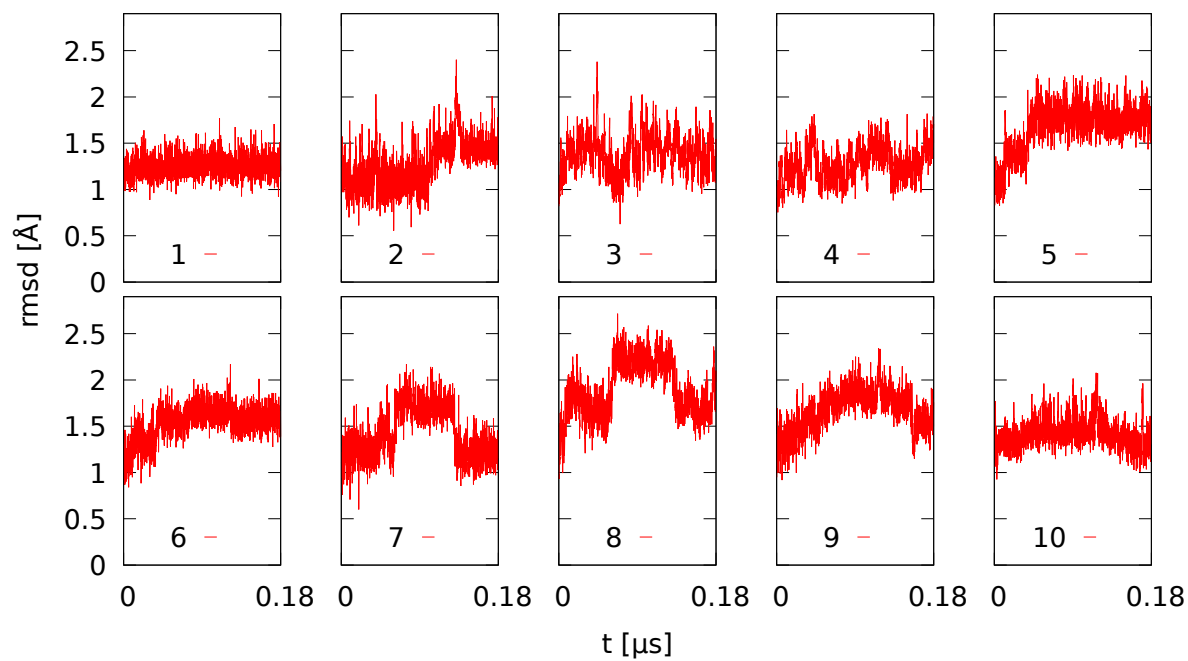

A

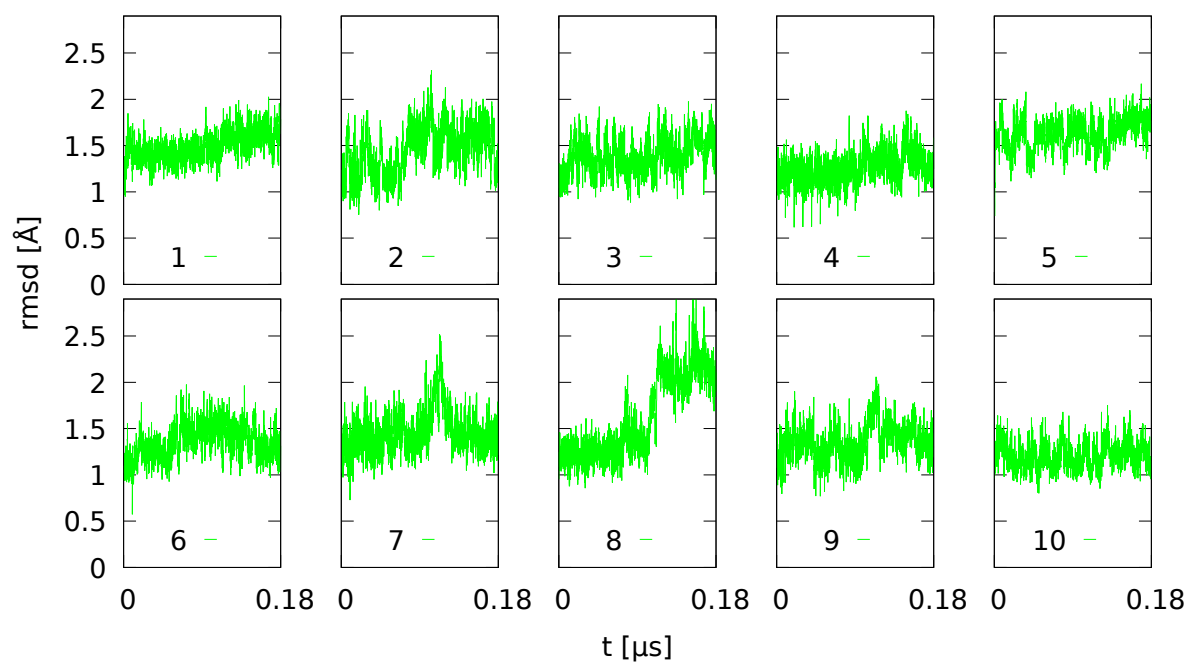

B



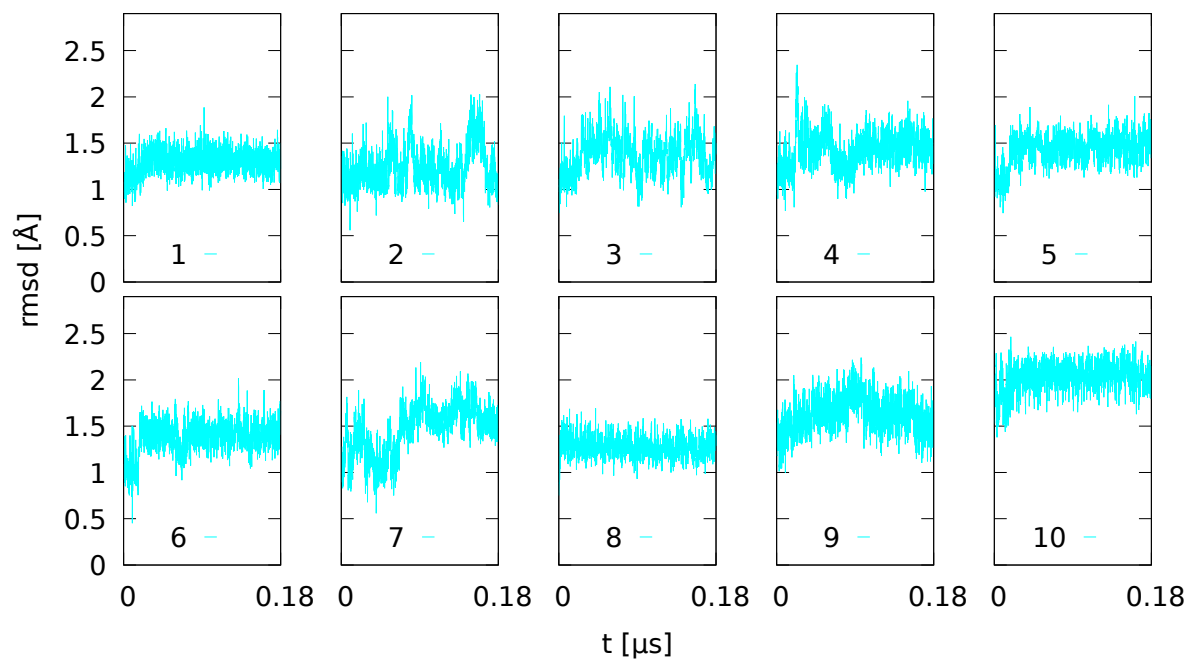

C

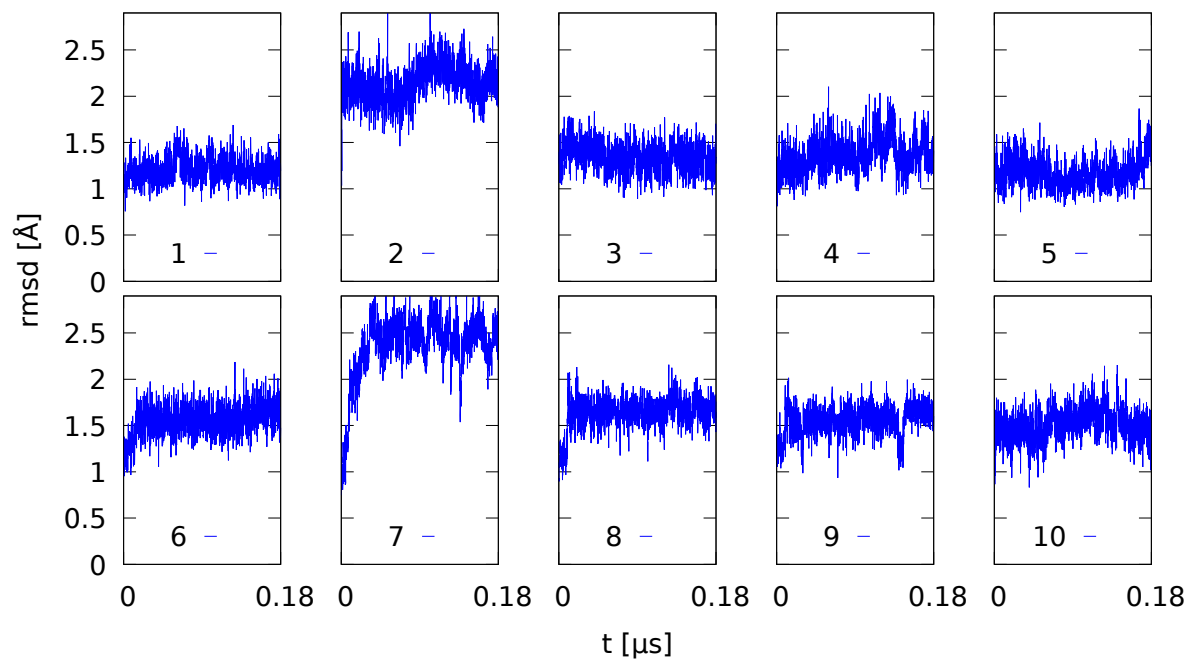

D

Figure S12: Variation of C $^{\alpha}$ -RMSD of the monomers of 2BL2 from their initial structures with simulation time for the 4 canonical MD trajectories (A – D) with type II restraints. The sub-panels are labelled with the numbers of the consecutive monomers.
